# Supplementary material for: Bioinspired Pd-Cu Alloy Nanoparticles as Accept Agent for Dye Degradation Performances
Source: MDPI journal article supplement (doi:10.3390/ijms232214072), 2022-11-15
Supplement: s1 [file s1]

# *Supporting Information*

## **Bioinspired Pd-Cu Alloy Nanoparticles as Accept Agent for Dye Degradation Performances**

**Shiyue Chen <sup>1,2,†</sup>, Yujun Yang <sup>3,†</sup>, Mingjun Zhang <sup>1,2</sup>, Xiaohong Ma <sup>4</sup>, Xiaoxiao He <sup>1,2</sup>, Teng Wang <sup>1,2</sup>, Xi Hu <sup>1,2</sup> and Xiang Mao <sup>1,2,\*</sup>**

<sup>1</sup> State Key Laboratory of Ultrasound in Medicine and Engineering, College of Biomedical Engineering, Chongqing Medical University, Chongqing 400016, China

<sup>2</sup> Chongqing Key Laboratory of Biomedical Engineering, College of Biomedical Engineering, Chongqing Medical University, Chongqing 400016, China

<sup>3</sup> Chongqing Medical Laboratory Microfluidics and SPRi Engineering Research Center, Key Laboratory of Laboratory Medical Diagnostics, Ministry of Education, Department of Laboratory Medicine, Chongqing Medical University, Chongqing 400016, China

<sup>4</sup> State Key Laboratory of Multi-Phase Complex Systems, Institute of Process Engineering, Chinese Academy of Sciences, Beijing 100190, China

\* Correspondence: [maox@cqmu.edu.cn](mailto:maox@cqmu.edu.cn)

† These authors contributed equally to this work.

# Supporting Information

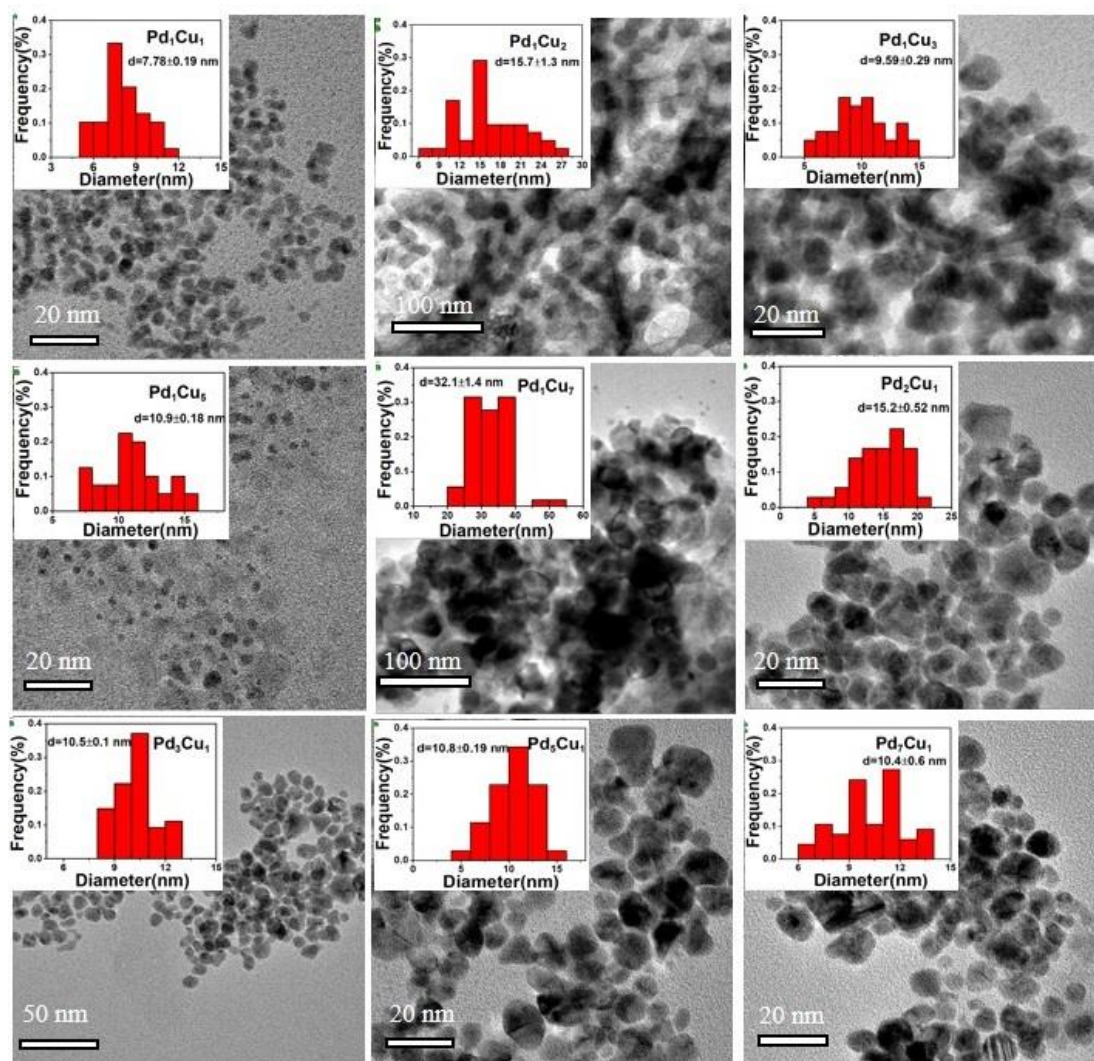

**Figure. S1.** TEM images and size distribution histogram of the Pd-Cu alloy NPs with different precursor ratios.

# Supporting Information

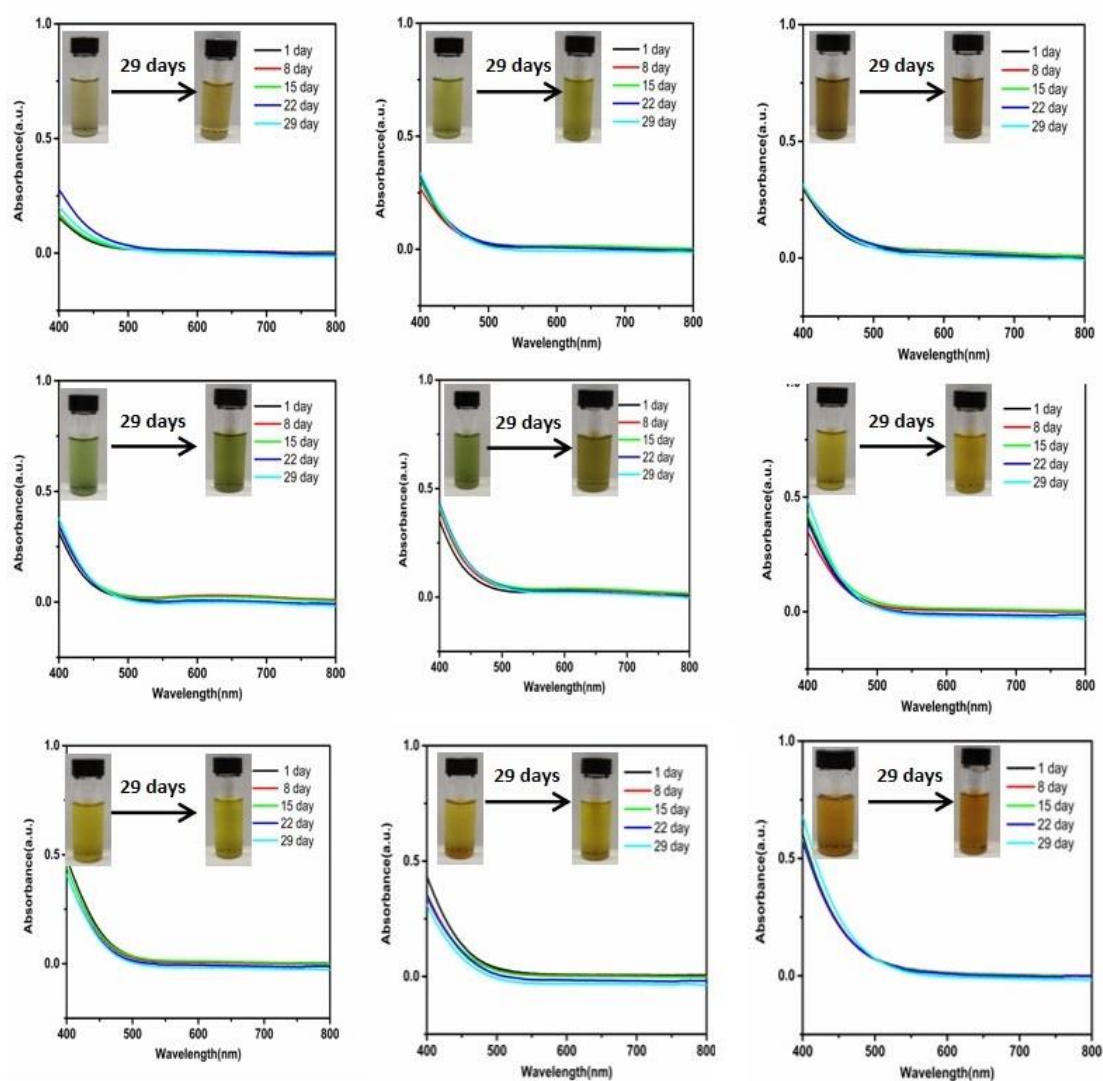

**Figure. S2.** UV-*vis* images and colloidal states of the Pd-Cu alloy NPs with different precursor ratios.

## *Supporting Information*

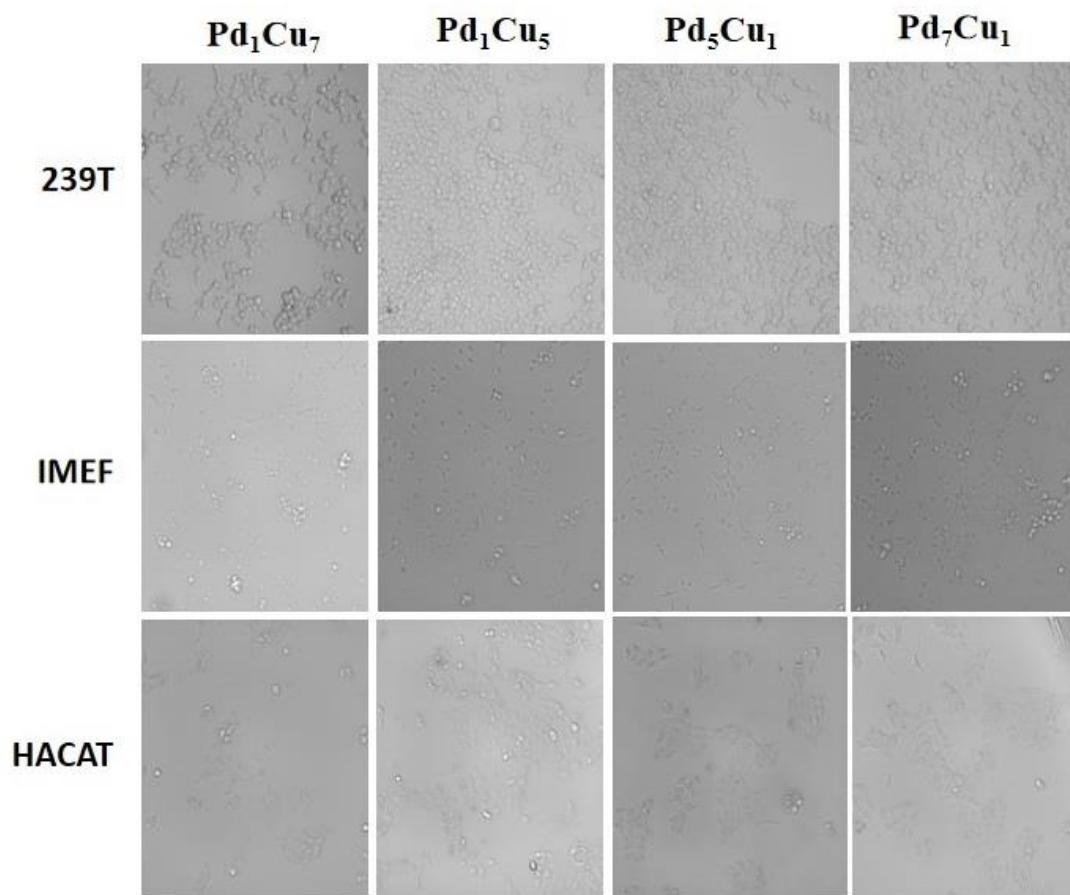

**Figure. S3.** Representative light microscopy images of 239T cell, IMEF cell, HACAT cell, which were treated by using  $50 \mu\text{g mL}^{-1}$  colloidal solutions ( $\text{Pd}_1\text{Cu}_5$ ,  $\text{Pd}_1\text{Cu}_7$ ,  $\text{Pd}_5\text{Cu}_1$ ,  $\text{Pd}_7\text{Cu}_1$  alloy NPs).

## Supporting Information

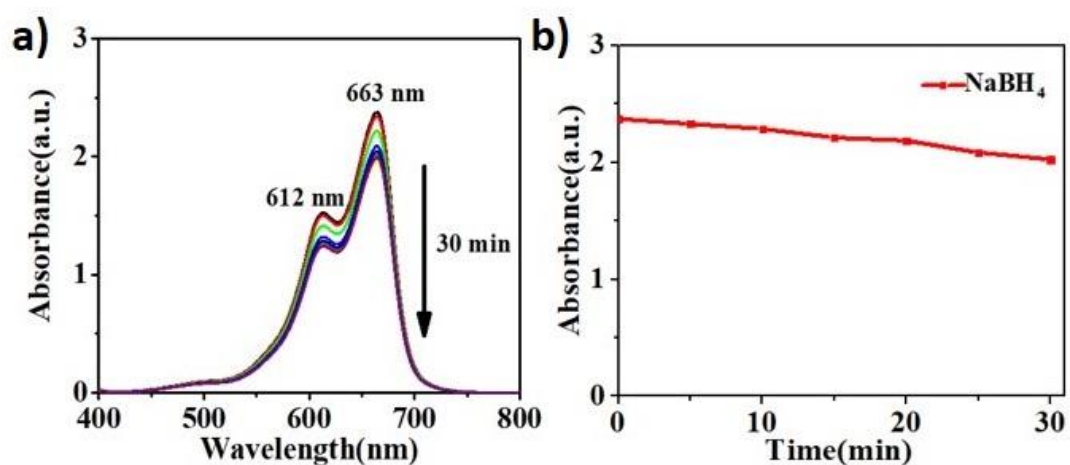

**Figure. S4.** a) Absorption spectra of MB in the presence of 0.1 mL of 0.2 M NaBH<sub>4</sub>. b) Absorption spectra recorded at 400 nm was affected by time.

## Supporting Information

**Table S1:** The concentration of substrate MB was controlled at 0.07 mM, and the content of catalyst was controlled at 0.01 mg. The influence of different catalysts on the reaction rate was compared, and the result was represented by  $K_{app}$ , and the higher the value of  $K_{app}$ , the faster the reaction rate.

| Samples                         | Reduction time(s) | Apparent rate constant ( $K_{app}$ , $10^{-3} s^{-1}$ ) | Activity parameter ( $K$ , $s^{-1} g^{-1}$ ) |
|---------------------------------|-------------------|---------------------------------------------------------|----------------------------------------------|
| Pd <sub>1</sub> Cu <sub>1</sub> | 270               | 12.9                                                    | 1290                                         |
| Pd <sub>1</sub> Cu <sub>2</sub> | 240               | 14.6                                                    | 1460                                         |
| Pd <sub>1</sub> Cu <sub>3</sub> | 210               | 17.1                                                    | 1710                                         |
| Pd <sub>1</sub> Cu <sub>5</sub> | 180               | 20.0                                                    | 2000                                         |
| Pd <sub>1</sub> Cu <sub>7</sub> | 150               | 24.0                                                    | 2400                                         |
| Pd <sub>2</sub> Cu <sub>1</sub> | 90                | 41.1                                                    | 4110                                         |
| Pd <sub>3</sub> Cu <sub>1</sub> | 60                | 66.7                                                    | 6670                                         |
| Pd <sub>5</sub> Cu <sub>1</sub> | 40                | 75.0                                                    | 7500                                         |
| Pd <sub>7</sub> Cu <sub>1</sub> | 30                | 100.0                                                   | 10000                                        |

# Supporting Information

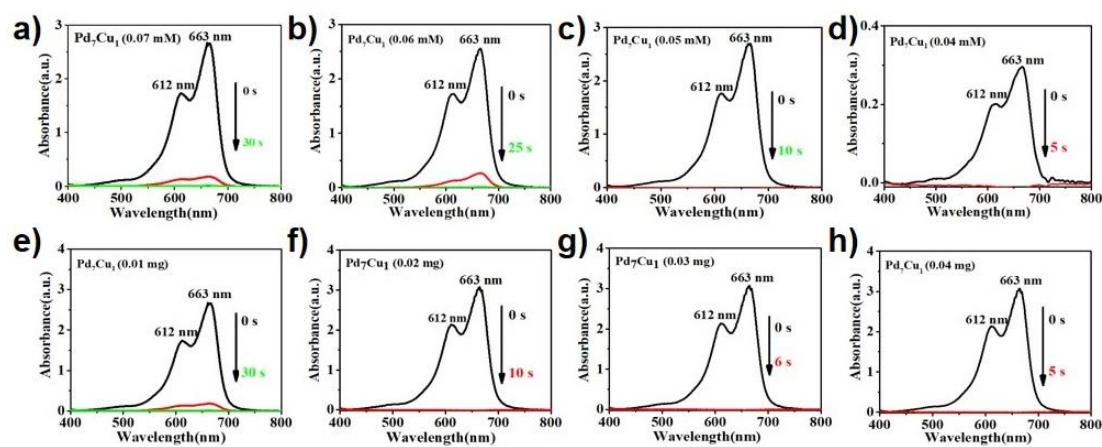

**Figure. S5.** UV-*vis* absorption spectra of degradation of a-d) with varying concentration of MB (0.04 - 0.07 mM) and constant amount (0.01 mg) of catalyst, e-h) with varying amount of catalyst (0.01 - 0.04 mg), and constant amount (0.07 mM) of MB dye.



# Supporting Information

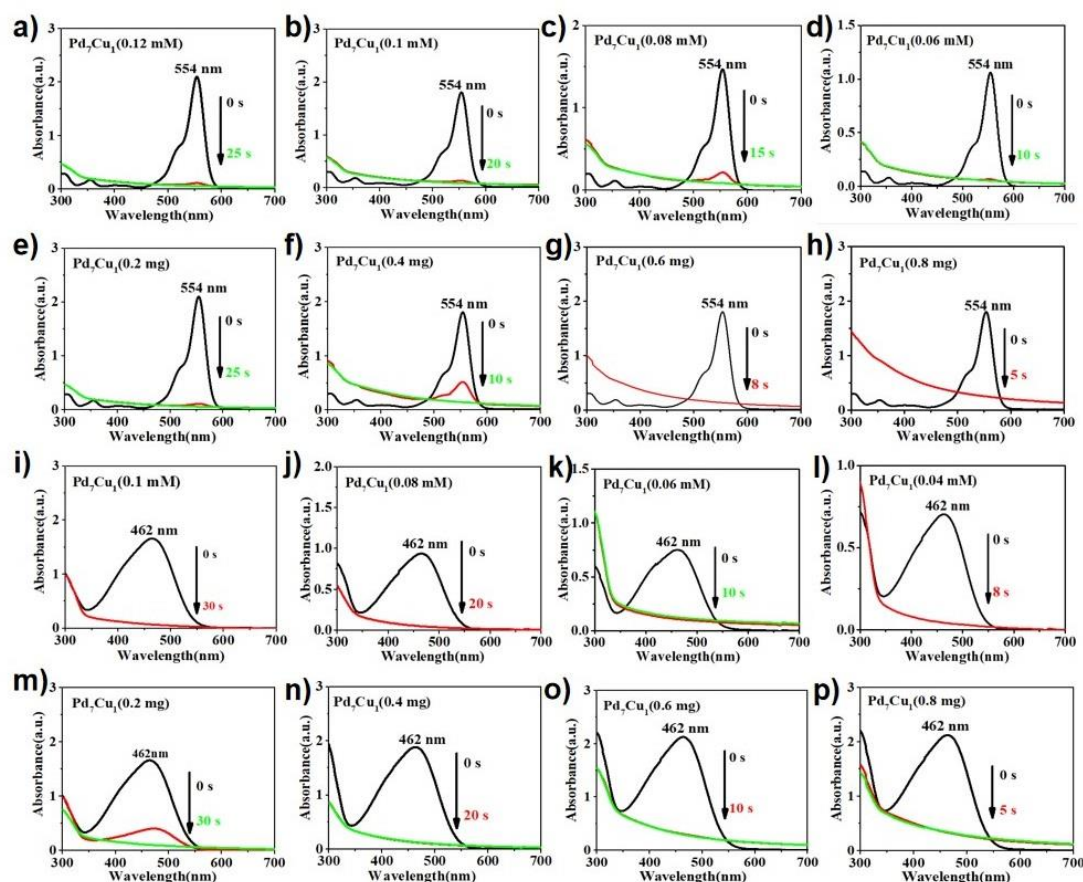

**Figure. S6.** UV-*vis* absorption spectra of degradation of a-d) with varying concentration of RhB (0.06 - 0.12 mM) and constant amount (0.2 mg) of catalyst, e-h) with varying amount of catalyst (0.2 - 0.8 mg), and constant amount (0.12 mM) of RhB dye, i - l) with varying concentration of MO (0.04 - 0.1 mM) and constant amount (0.2 mg) of catalyst, m - p) with varying amount of catalyst (0.2 - 0.8 mg), and constant amount (0.1 mM) of MO dye.



# Supporting Information

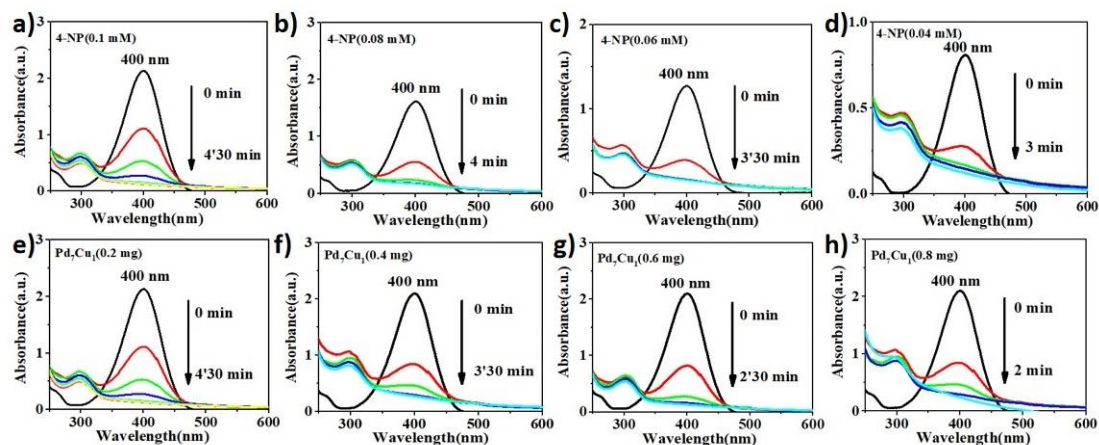

**Figure. S7.** UV-vis absorption spectra of degradation of a-d) with varying concentration of 4-NP (0.04 – 0.1 mM) and constant amount (0.2 mg) of catalyst, e-h) with varying amount of catalyst (0.2 - 0.8 mg), and constant amount (0.1 mM) of 4-NP.

## *Supporting Information*

Table S2. Summary of Reaction Time (s), Apparent Rate Constant (K<sub>app</sub>) and Activity Parameter (K) for Degradation of 4-NP with Varying Concentration and Catalytic Loading.

| concentration of<br>4-NP (mM) | amount of<br>catalyst (mg) | reaction (s) | Apparent rate constant<br>(K <sub>app</sub> , 10 <sup>-3</sup> s <sup>-1</sup> ) | Activity parameter<br>(K, s <sup>-1</sup> g <sup>-1</sup> ) |
|-------------------------------|----------------------------|--------------|----------------------------------------------------------------------------------|-------------------------------------------------------------|
| 0.04                          | /0.2                       | 180          | 11.2                                                                             | 56                                                          |
| 0.06                          | 0.2                        | 210          | 9.9                                                                              | 49.5                                                        |
| 0.08                          | 0.2                        | 240          | 8.7                                                                              | 43.5                                                        |
| 0.1                           | 0.2                        | 270          | 6.9                                                                              | 34.5                                                        |
| 0.1                           | 0.4                        | 210          | 8.5                                                                              | 21.25                                                       |
| 0.1                           | 0.6                        | 150          | 19.1                                                                             | 31.83                                                       |
| 0.1                           | 0.8                        | 120          | 26.2                                                                             | 32.75                                                       |

# Supporting Information

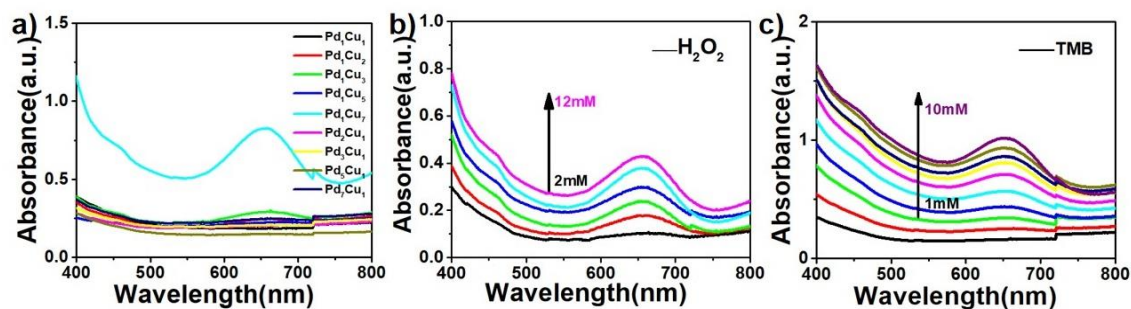

**Figure. S8.** a) UV-*vis* absorbance spectra of peroxidase-like activity in different concentrations of the Pd-Cu alloy NPs with different precursor ratios; b) UV-*vis* absorbance spectra of peroxidase-like activity in different concentrations of H<sub>2</sub>O<sub>2</sub>; c) UV-*vis* absorbance spectra of peroxidase-like activity in different concentrations of TMB.

# *Supporting Information*

**Table S3:** Kinetic parameters of Pd<sub>7</sub>Cu<sub>1</sub> alloy NPs.

| Enzyme                                    | Substrate                     | K <sub>m</sub> (mM) | V <sub>max</sub> (mM s <sup>-1</sup> ) |
|-------------------------------------------|-------------------------------|---------------------|----------------------------------------|
| Pd <sub>1</sub> Cu <sub>7</sub> alloy NPs | H <sub>2</sub> O <sub>2</sub> | 18.26               | 4.34                                   |
| Pd <sub>1</sub> Cu <sub>7</sub> alloy NPs | TMB                           | 10.62               | 7.69                                   |

## Supporting Information

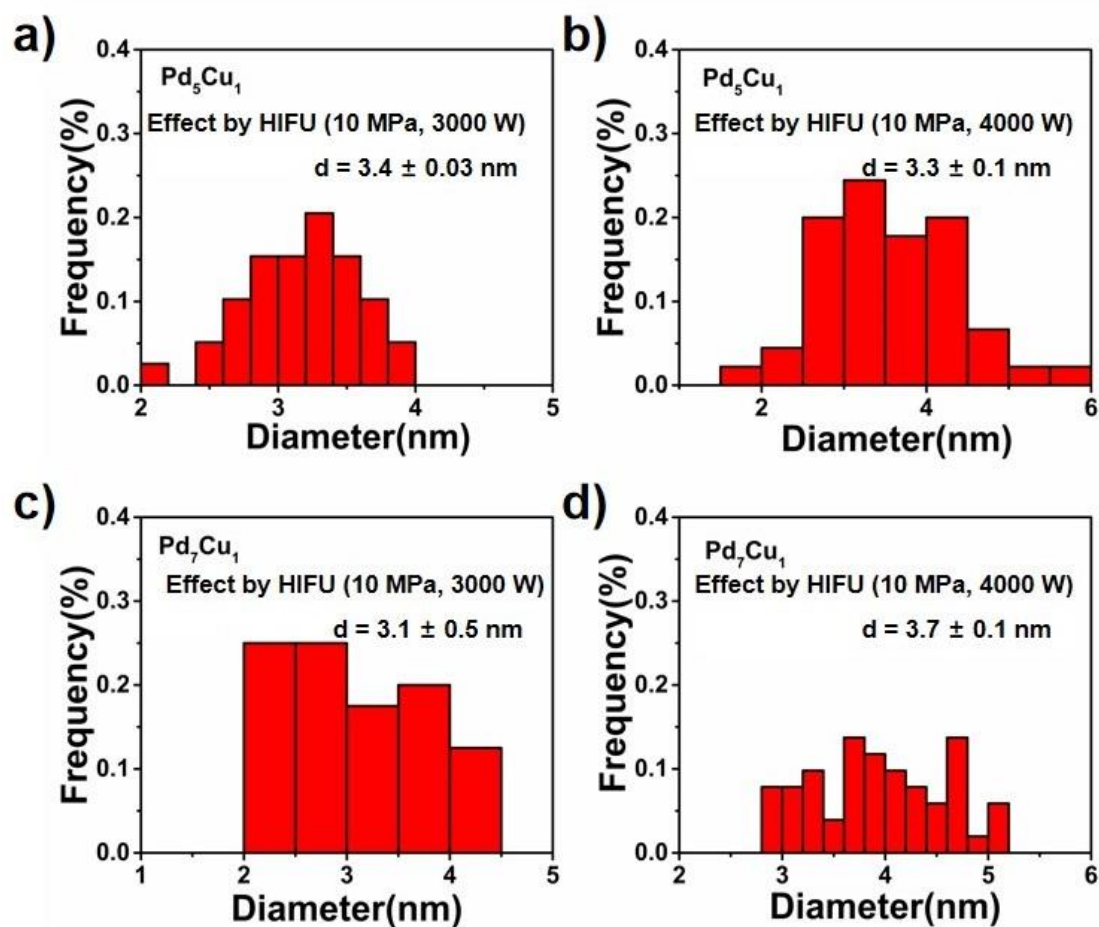

**Figure. S9.** Size distribution histogram of  $\text{Pd}_5\text{Cu}_1$  alloy NPs and  $\text{Pd}_7\text{Cu}_1$  alloy NPs effected by HIFU with different ultrasonic parameters.

## Supporting Information

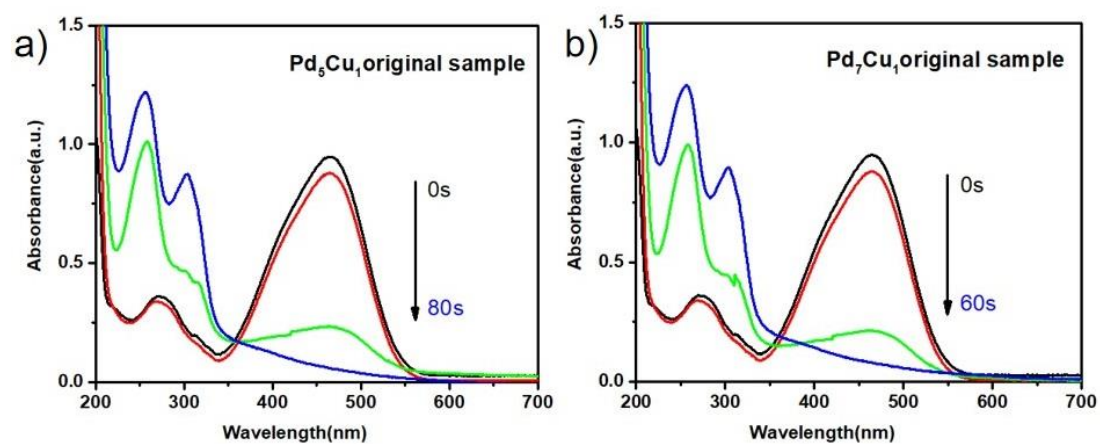

**Figure. S10.** UV-*vis* absorbance spectra of degradation of 0.06 mM MO by NaBH<sub>4</sub> in the presence of 100  $\mu$ L of Pd<sub>5</sub>Cu<sub>1</sub> and Pd<sub>7</sub>Cu<sub>1</sub> alloy NPs.

## Supporting Information

**Table S4:** Summary of Comparative Reduction Time (t), Apparent Rate Constant ( $k_{app}$ ), and Activity Parameter (K) for Different MTANP Samples. The concentration of substrate MO was controlled at 0.06 mM, and the content of NaBH<sub>4</sub> was controlled at 100  $\mu$ L (0.1 mM). The effect of different catalysts on reaction rates can be observed in the table below.

| Sample name                                   | Reduction time(s) | Apparent rate constant<br>( $K_{app}$ , $10^{-3}s^{-1}$ ) |
|-----------------------------------------------|-------------------|-----------------------------------------------------------|
| Pd <sub>5</sub> Cu <sub>1</sub>               | 80                | 40.1                                                      |
| Pd <sub>7</sub> Cu <sub>1</sub>               | 60                | 53.5                                                      |
| Pd <sub>5</sub> Cu <sub>1</sub> (10MPa,3000W) | 30                | 107                                                       |
| Pd <sub>5</sub> Cu <sub>1</sub> (10MPa,4000W) | 18                | 178.3                                                     |
| Pd <sub>7</sub> Cu <sub>1</sub> (10MPa,3000W) | 20                | 160.5                                                     |
| Pd <sub>7</sub> Cu <sub>1</sub> (10MPa,4000W) | 9                 | 356.7                                                     |



# *Supporting Information*

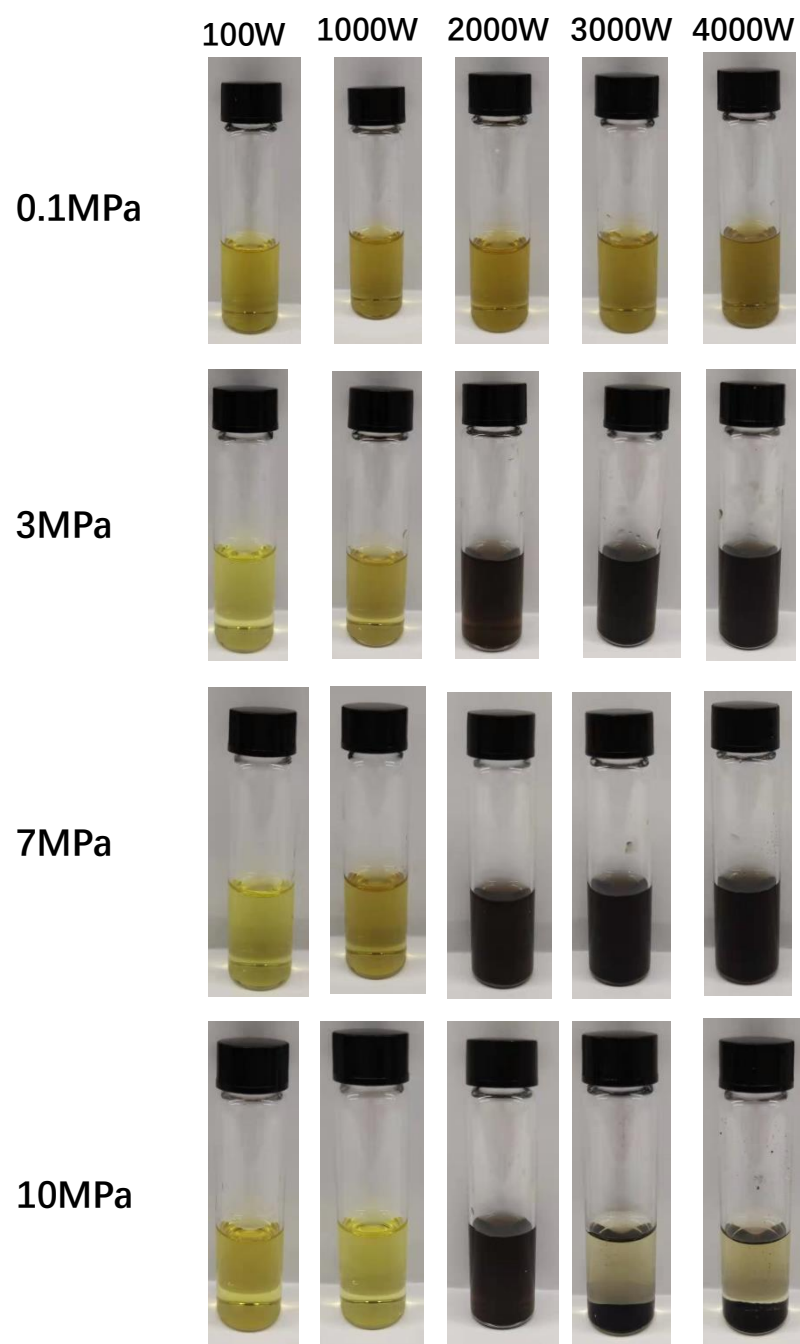

**Figure. S11.** Solution states of Pd<sub>5</sub>Cu<sub>1</sub> alloy NPs affected by different ultrasonic parameters.

# *Supporting Information*

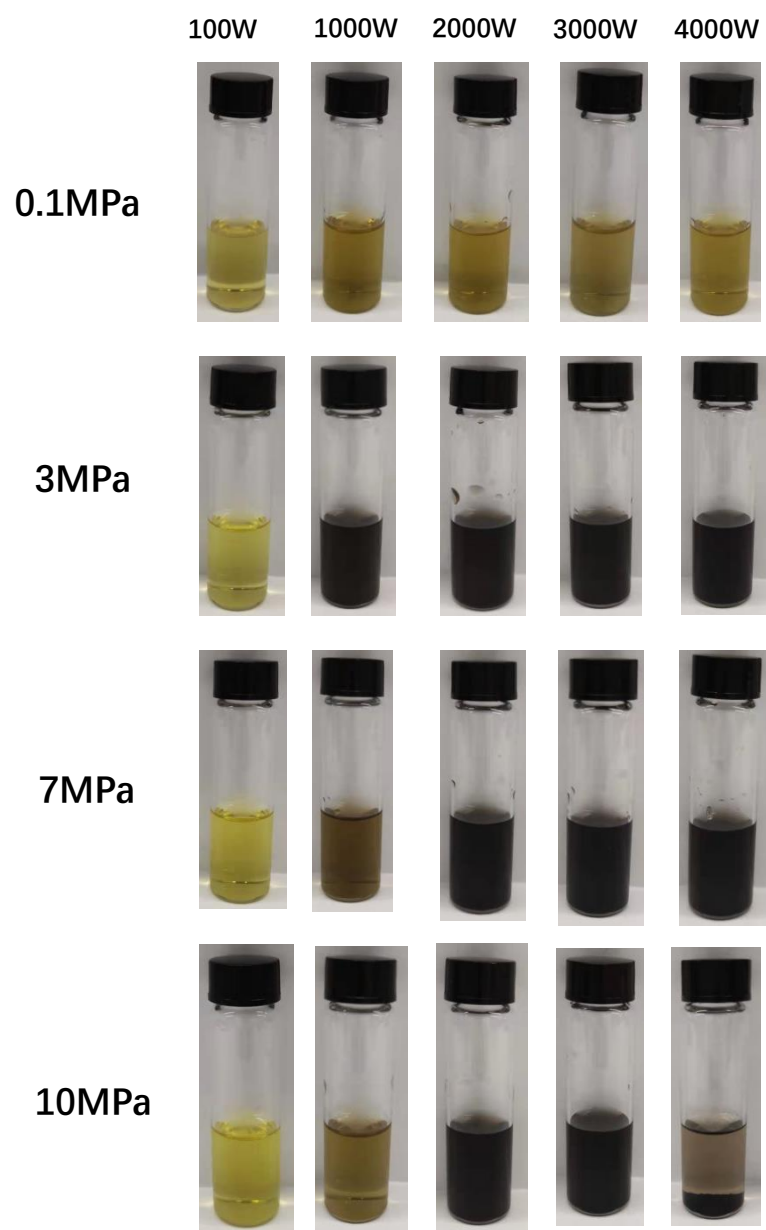

**Figure. S12.** Solution states of Pd<sub>7</sub>Cu<sub>1</sub> alloy NPs affected by different ultrasonic parameters.
